# Supplementary material
Source: PubMed Central journal article supplement (PMC3811316)
Supplement: AAC.01372-13_zac011132269so1.pdf [file AAC.01372-13_zac011132269so1.pdf]

*Supplemental material*

**Improved Lethal Effect of Cpl-7, a Pneumococcal Phage Lysozyme of Broad Bactericidal Activity by Inverting Net Charge of its Cell Wall-Binding Module**

**Roberto Díez-Martínez,<sup>a,c</sup> Héctor de Paz,<sup>a</sup> Noemí Bustamante,<sup>b,c</sup> Ernesto García,<sup>a,c</sup> Margarita Menéndez,<sup>b,c\*</sup> Pedro García<sup>a,c\*</sup>**

Departamento de Microbiología Molecular y Biología de las Infecciones, Centro de Investigaciones Biológicas, CSIC, Madrid, Spain<sup>a</sup>; Departamento de Química-Física Biológica, Instituto Química-Física Rocasolano, CSIC, Madrid, Spain<sup>b</sup>; CIBER de Enfermedades Respiratorias (CIBERES), Madrid, Spain<sup>c</sup>

**Running title: Improved Bactericidal Effect of a Phage Lysozyme**

Address correspondence to Pedro García, [pgarcia@cib.csic.es](mailto:pgarcia@cib.csic.es).

\* These authors contributed equally to this work.

*Contents:*

Supplemental Figure S1

Supplemental Figure S2

Supplemental Figure S3

Supplemental Figure S4

Supplemental Figure S5

Supplemental Figure S6

Supplemental Table S1

- **Full-length Cpl-7S:** 1,029 bp, 342 amino acids, 38,581 Da, theoretical pI: 4.63.
- **N-terminal module:** Catalytic module from GH-25 family of glycosyl hydrolases. It cleaves *N*-acetylmuramoyl-( $\beta$  1,4)-*N*-acetylglucosamine bonds (amino acids 1–188).
- **Linker region:** Amino acids 189–204.
- **C-terminal module:** Cell wall-binding module (CWBM) formed by three identical CW\_7 repeats (amino acids 205–342).

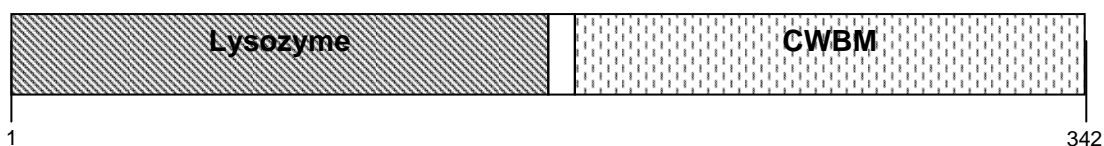

Nucleotide sequence:

```

          10          20          30          40          50          60
ATGGTTAAAA AGAACGACCT GTTCGTTGAC GTTGCGTCTC ACCAGGGTTA CGACATCTCT

          70          80          90         100         110         120
GGTATCCTGG AAGAAGCGGG TACCACCAAC ACCATCATCA AAGTTTCTGA ATCTACCAGC

          130         140         150         160         170         180
TACCTGAACC CGTGCCTGTC TGCGCAGGTT TCTCAGTCTA ACCCGATCGG TTTCTACCAC

          190         200         210         220         230         240
TTCGCGTGGT TCGGTGGTAA CGAAGAAGAA GCGGAAGCGG AAGCGCGTTA CTTCTCTGGAC

          250         260         270         280         290         300
AACGTTCCGA CCCAGGTTAA ATACCTGGTT CTGGACTACG AAGACCACGC GTCTGCGTCT

          310         320         330         340         350         360
GTTCAGCGTA ACACCACCGC GTGCCTGCGT TTCATGCAGA TCATCGCGGA AGCGGGTTAC

          370         380         390         400         410         420
ACCCCGATCT ACTACTCTTA CAAACCGTTC ACCCTGGACA ACGTTGACTA CCAGCAGATC

          430         440         450         460         470         480
CTGGCGCAGT TCCCGAACTC TCTGTGGATC GCGGGTTACG GTCTGAACGA CGGTACCGCG

          490         500         510         520         530         540
AACTTCGAAT ACTTCCCGTC TATGGACGGT ATCCGTTGGT GGCAGTACTC TTCTAACCCG

          550         560         570         580         590         600
TTCGACAAAA ACATCGTTCT GCTGGACGAC GAAAAAGAAG ACAACATCAA CAACGAAAAC

          610         620         630         640         650         660
ACCCTGAAAT CTCTGACGAC CGTTGCGAAT GAAGTTATCC AAGGTAAATG GGGTAATGGC

          670         680         690         700         710         720

```



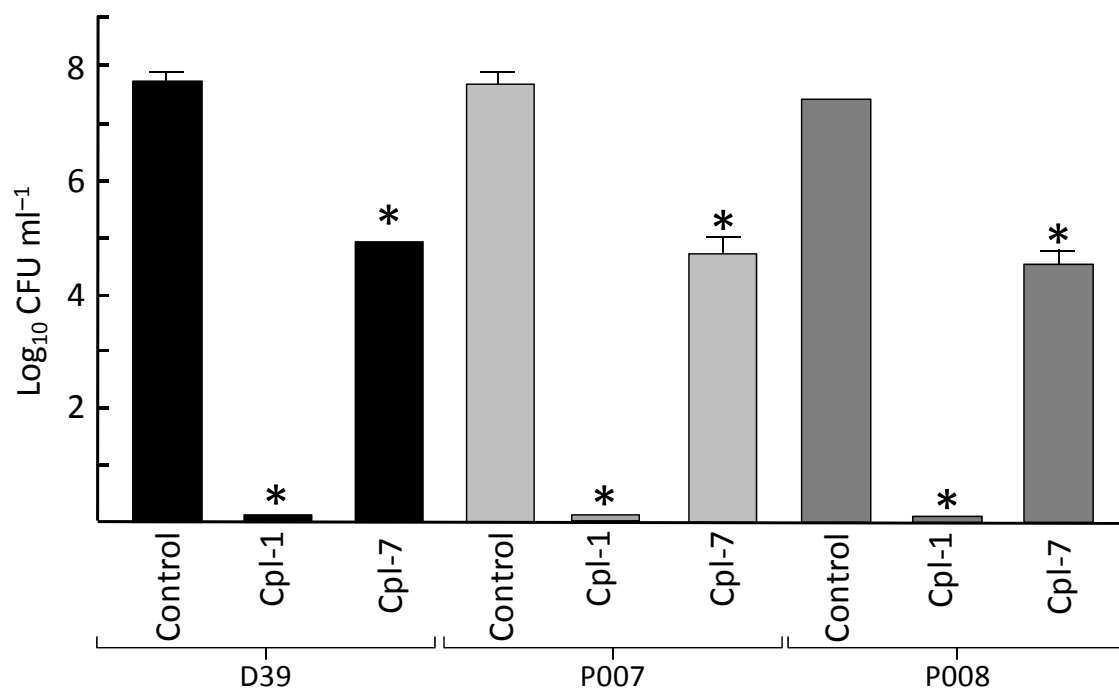

**Figure S2. Bactericidal effects of Cpl-1 and Cpl-7 against different pneumococcal strains.** Exponentially growing D39, P007 or P008 strains were washed, suspended in PBS at an  $OD_{550} \approx 0.6$ , and incubated in the absence or in the presence of the selected enzyme ( $5 \mu\text{g} \cdot \text{ml}^{-1}$ ) at  $37^\circ\text{C}$ . Viable cells, after 60 min incubation in the same conditions, were determined on blood-agar plates. Error bars represent standard deviations, and asterisks mark results that are statistically significant compared to controls in the absence of enzybiotics (one-way ANOVA with a post hoc Dunnet test; \*,  $P < 0.001$ ).

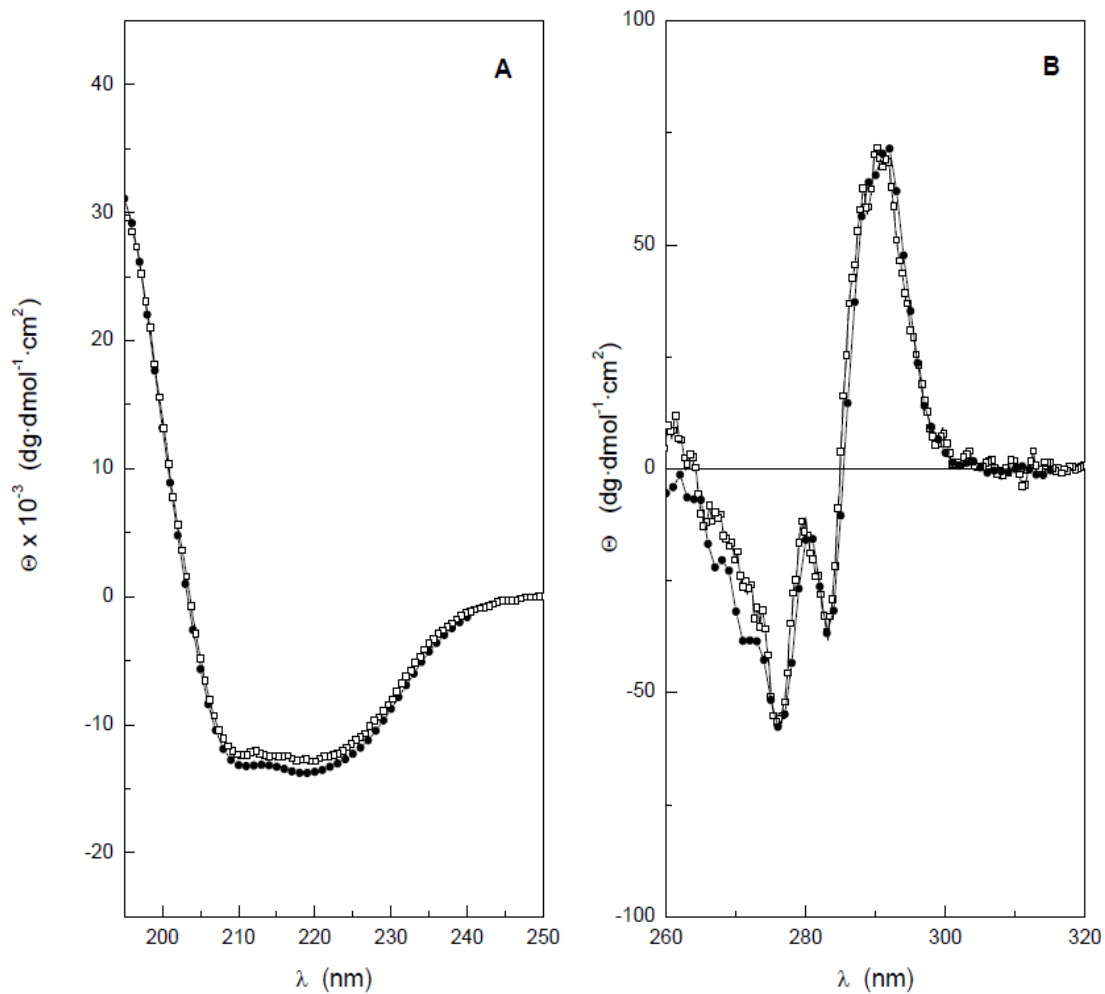

**Figure S3. Structure conservation in Cpl-7S lysozyme.** Comparison of far- (A) and near-UV (B) CD spectra of Cpl-7 (circles) and Cpl-7S (squares). Data were monitored at  $0.2 \text{ mg} \cdot \text{ml}^{-1}$  (far UV-spectra) and  $0.8 \text{ mg} \cdot \text{ml}^{-1}$  (near UV-spectra) in 20 mM phosphate buffer, pH = 7.0, at 20°C.

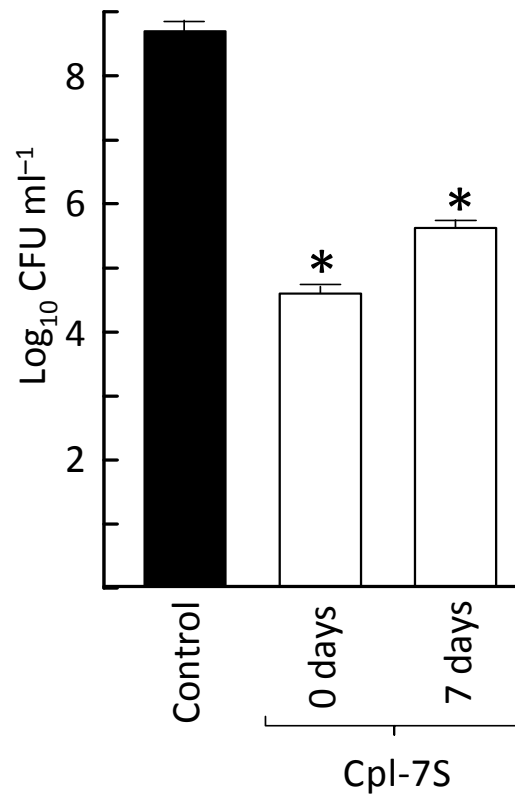

**Figure S4. Variation of Cpl-7S bactericidal effect with incubation at 37°C.** Pneumococcal R6 cells were treated as in Fig. S2 and viable cells were determined on blood-agar plates after 60 min treatment with Cpl-7S recently prepared or kept at 37°C for 7 days. Data are the mean of three independent experiments. Error bars represent standard deviations, and asterisks mark results that are statistically significant compared to controls in the absence of the enzyme (one-way ANOVA with a post hoc Dunnet test; \*,  $P < 0.001$ ).

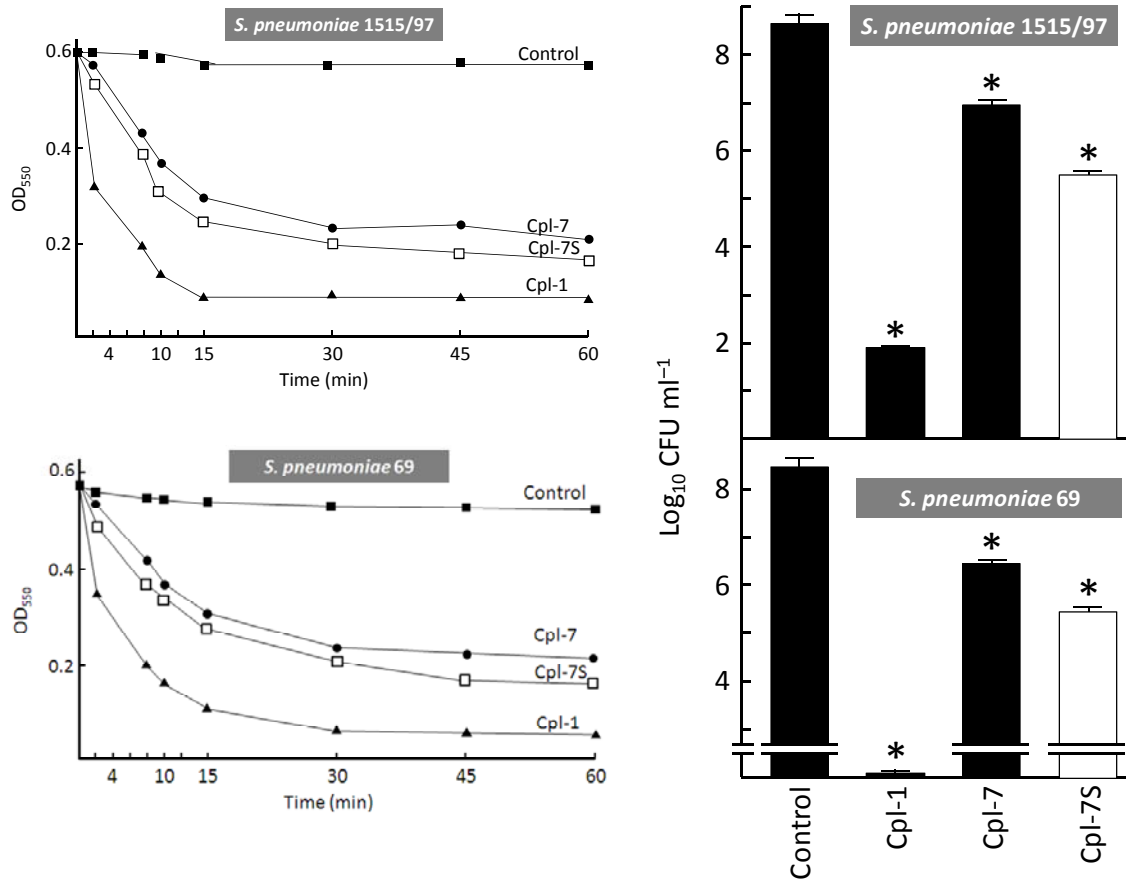

**Figure S5. Bacteriolytic and bactericidal effects of different lysozymes against two pneumococcal multiresistant strains.** Exponentially growing 1515/97 or 69 strains were washed, suspended in PBS at an  $OD_{550} \approx 0.6$ , and incubated in the absence or in the presence of the selected enzyme ( $5 \mu\text{g} \cdot \text{ml}^{-1}$ ) at  $37^\circ\text{C}$ . Viable cells, after 60 min incubation in the same conditions, were determined on blood-agar plates. Error bars represent standard deviations, and asterisks mark results that are statistically significant compared to controls in the absence of enzybiotics (one-way ANOVA with a post hoc Dunnet test; \*,  $P < 0.001$ ).

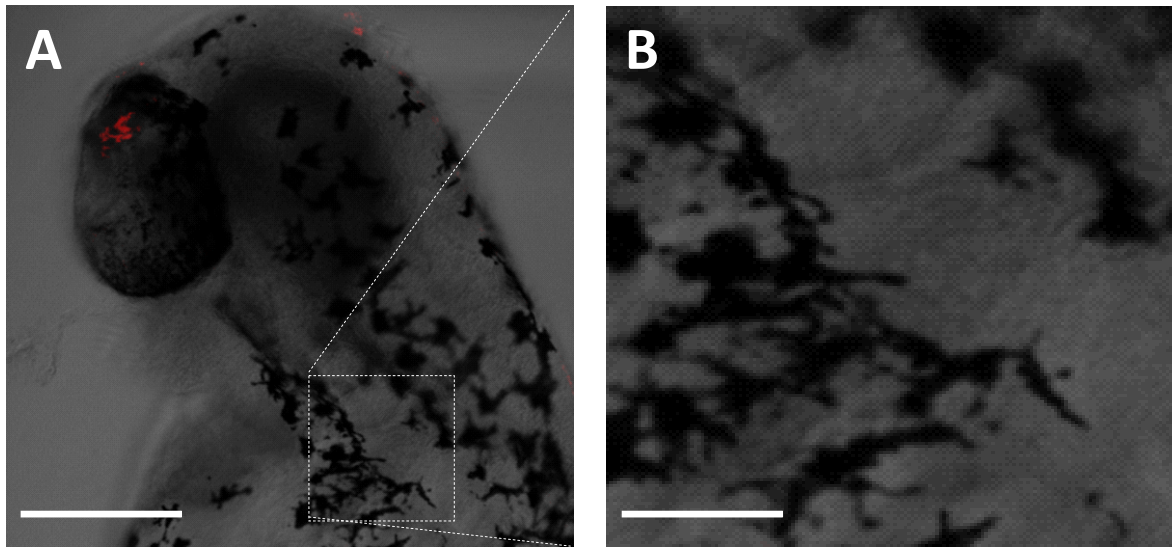

**Figure S6.** Representative whole-mount immunofluorescence of zebrafish embryos used as controls in infection assays. Maximal projections from 15 z-stacks were constructed from fluorescence and differential interference contrast confocal images. (A) Pneumococcal-free 5 d post fecundation embryo (20× objective) treated as in Fig. 7 showing transmitted light and red fluorescence overlay. (B) Details around the gills (40× objective). Bars (A), 250  $\mu\text{m}$ ; (B), 25  $\mu\text{m}$ .



**Table S1.** Type of activity and net charge of relevant pneumococcal murein hydrolases.

| <b><u>Protein</u></b> | <b>Activity</b>     | <b>Z<sub>CM</sub></b> | <b>Z<sub>link</sub></b> | <b>Z<sub>CWBM</sub></b> | <b>Z<sub>Total</sub></b> |
|-----------------------|---------------------|-----------------------|-------------------------|-------------------------|--------------------------|
| Cpl-7                 | Lysozyme (GH25)     | -10.86                | -3.98                   | -14.93                  | -29.77                   |
| Cpl-1                 | Lysozyme (GH25)     | -9.86                 | -3.98                   | -0.98                   | -14.82                   |
| LytA                  | Amidase (Amidase_2) | -7.89                 | -1.99                   | -4.69                   | -14.57                   |
| Pal                   | Amidase (Amidase_5) | -4.74                 | 1.00                    | -6.83                   | -10.57                   |
| Cpl-7S                | Lysozyme (GH25)     | -10.86                | -3.98                   | 3.0                     | -11.84                   |

Charges refer to the catalytic module (**Z<sub>CM</sub>**), the linker (**Z<sub>link</sub>**), the cell wall-binding module (**Z<sub>CWBM</sub>**) and the overall sequence (**Z<sub>Total</sub>**).
